# Supplementary material for: Slow wave–spindle coupling during deep sleep is selectively linked to Plasma Amyloid-β levels in Older Adults
Source: Research Square preprint supplement (doi:10.21203/rs.3.rs-7085440/v1), 2025-07-14
Supplement: Supplementary file 1 [file 4dc71980cf32f7985a9c2439.docx]

**Supplementary Information**

**Slow wave–spindle coupling during deep sleep is selectively linked to Plasma Amyloid-β levels in Older Adults**

Marina Wunderlin1*, Korian Wicki1,2, Charlotte Elisabeth Teunissen3, Marc Alain Züst1*

1University Hospital of Old Age Psychiatry and Psychotherapy, University of Bern, 3000 Bern 60, Switzerland

2Graduate School for Health Sciences, University of Bern, 3012 Bern, Switzerland

3Neurochemistry Laboratory, Department of Clinical Chemistry, Amsterdam Neuroscience, Neurodegeneration, Amsterdam UMC, Vrije Universiteit Amsterdam, 1081 HV Amsterdam, Netherlands

*** Corresponding authors:**Marina Wunderlin, Marc A. Züst
marina.wunderlin2@unibe.ch; marc.a.zuest@unibe.ch

**Supplementary materials**

1. **Baseline Sample**

|  | Means (SE) Baseline Sample, **Cognitively impaired** (n=17) | Means (SE) Baseline Sample, **Healthy** (n=30) | test statistic | P value |
| --- | --- | --- | --- | --- |
| age | 71.9 (0.9) | 69.6 (0.9) | 173.5 | 0.072 |
| **MOCA1** | **23.2** (0.4) | **27.9** (0.3) | **0** | **<.0001** |
| PSQI2 | 5.2 (0.7) | 4.2 (0.3) | 208 | 0.3 |
| AHI3 | 9.7 (2.4) | 7.4 (1.3) | -0.93 | 0.4 |
| Baseline plasma Aβ42/Aβ404 | 0.0662 (0.002) | 0.0676 (0.002) | 229 | 0.6 |
| Baseline plasma Aβ42 | 6.67 (0.3) | 6.60 (0.3) | 238 | 0.7 |
| Baseline plasma Aβ40 | 101.40 (3.9) | 97.13 (2.2) | 207 | 0.3 |
| SW–spindle coupling strength5 | 0.17 (0.01) | 0.19 (0.02) | 216 | 0.4 |
| SW–spindle coupling directionality6 | 0.000219 (0.0008) | 0.000561 (0.0005) | 226 | 0.5 |
| SW amplitude | 14.2 (1.1) | 17.0 (0.9) | 169 | 0.058 |
| %N1 | 32.3 (2.0) | 29.2 (2.4) | 191 | 0.2 |
| %N2 | 49.7 (1.6) | 47.0 (1.7) | 191 | 0.2 |
| **%N3** | **5.1** (1.3) | **10.8** (1.5) | **147** | **0.017** |
| %REM | 13.0 (1.2) | 13.1 (0.9) | 237 | 0.7 |
| Total sleep time (min) | 339.3 (14.0) | 332.0 (12.7) | 248.5 | 0.9 |
| Sleep efficiency | 69.7 (2.8) | 72.8 (1.8) | 213 | 0.4 |
| Wake time after sleep onset (min) | 136.7 (13.9) | 112.5 (8.2) | 183.5 | 0.1 |

1. **Subset: PLAS protocol Sample**

|  | Means (SE) Baseline Sample, **Cognitively impaired** (n=16) | Means (SE) Baseline Sample, **Healthy** (n=23) | test statistic | P value |
| --- | --- | --- | --- | --- |
| age | 71.9 (1) | 69.5 (1) | 126.5 | 0.1 |
| **MOCA1** | **23.2 (0.4)** | **27.8 (0.3)** | **0** | **<.0001** |
| PSQI2 | 5.2 (0.8) | 4.1 (0.3) | 153.5 | 0.4 |
| AHI3 | 10.3 (2.4) | 8.5 (1.9) | -0.6 | 0.6 |
| Baseline plasma Aβ42/Aβ404 | 0.0660 (0.002) | 0.0663 (0.002) | 182 | 0.1 |
| Baseline plasma Aβ42 | 6.66 (0.3) | 6.3 (0.3) | 145 | 0.3 |
| Baseline plasma Aβ40 | 101.53 (4.1) | 94.73 (2.6) | 135 | 0.2 |
| SW–spindle coupling strength5 | 0.16 (0.01) | 0.19 (0.02) | 155 | 0.4 |
| SW–spindle coupling directionality6 | 0.000035 (0.0008) | 0.000605 (0.0005) | 142 | 0.2 |
| SW amplitude | 14.4 (1.2) | 17 (1) | 125 | 0.095 |
| %N1 | 32.5 (2.1) | 29.3 (2.9) | 128 | 0.1 |
| %N2 | 49 (1.6) | 45.9 (1.5) | 138 | 0.2 |
| **%N3** | **5.4 (1.4)** | **11.5 (1.9)** | **115** | **0.050** |
| %REM | 13.2 (1.3) | 13.3 (1.1) | 164 | 0.6 |
| Total sleep time (min) | 342.4 (14.5) | 342.2 (12) | 180 | 0.9 |
| Sleep efficiency | 71 (2.7) | 71.3 (2.1) | 179 | 0.9 |
| Wake time after sleep onset (min) | 128.1 (11.7) | 121.2 (8.4) | 156.5 | 0.4 |

*Table S1. Characteristics of study participants, separated into cognitively healthy and cognitively impaired groups. Means, standard errors, test statistics (either t or U, based on normality) and p values are provided for both groups for the baseline sample (****A****) and the subset: PLAS protocol sample (****B****). 1)Montreal Cognitive Assessment, maximum score: 30, >26 cognitively healthy. 2)Pittsburgh Sleep Quality Index, <5 normal sleep. 3)Apnea-Hypopnea Index <5: normal sleep; 5≤AHI<15: mild sleep apnea. 4)Plasma amyloid-beta 42/40 ratio, lower scores are indicative of a higher risk for dementia. 5)Measured via resultant vector length. 6)Measured via phase-slope index.*

| **Informed model** | | |
| --- | --- | --- |
| Conservative — Outliers out | | |
|  | Healthy (n=30) | CI (n=17) |
| Aβ 42/40 | ~ 1 + (MOCA) + **RVL** + (PSI) | ~ 1 + **PSI** + (number of matched spindles) + SW amplitude + (age) + gender_f |
| Aβ 42 | ~ 1 + MOCA + **RVL** + PSI | ~ 1 + MOCA + **PSI** |
| Aβ 40 | ~ 1 + (MOCA) + RVL + (PSI) | ~ 1 + MOCA + (PSI) |
| Liberal — Outliers in | | |
|  | Healthy (n=30) | CI (n=17) |
| Aβ 42/40 | ~ 1 + **RVL** + (PSI) | ~ 1 + **PSI** + (number of matched spindles) + SW amplitude + age + (gender_f) |
| Aβ 42 | ~ 1 + (MOCA) + **RVL** + PSI | ~ 1 + (MOCA) + **PSI** |
| Aβ 40 | ~ 1 + (MOCA) + RVL + (PSI) | ~ 1 + MOCA + (PSI) |
| **Empty model** | | |
| Conservative — Outliers out | | |
|  | Healthy (n=30) | CI (n=17) |
| Aβ 42/40 | ~ 1 + **RVL** + Spindle amplitude + gender_m | ~ 1 + (MOCA) + **PSI** |
| Aβ 42 | ~ 1 + **RVL** + gender_m | ~ 1 + MOCA + **PSI** |
| Aβ 40 | ~ 1 + percentage of N2 | ~ 1 + MOCA |
| Liberal — Outliers in | | |
| Aβ 42/40 | ~ 1 + **RVL** | ~ 1 + (MOCA) + **PSI** |
| Aβ 42 | ~ 1 + **RVL** + gender_m | ~ 1 + (MOCA) + **PSI** |
| Aβ 40 | ~ 1 + Sleep Efficiency + gender_m | ~ 1 + MOCA |

*Table S2. Optimized regression models for cognitively healthy vs. impaired older adults. The variables best describing Amyloid-beta (Aβ) 42/40 ratio, Aβ 42 and Aβ 40 are depicted separately for cognitively healthy and impaired older adults. Conservative models exclude outliers, while liberal models include all participants. The informed model was defined as Aβ variable ~ MOCA score + number of coupled spindles + SW amplitude + age + resultant vector length (RVL, coupling strength) + phase slope index (PSI, coupling directionality), with additional variables of interest including spindle amplitude, percentage of sleep stages (N1, N2, N3, REM), total sleep time, sleep efficiency, baseline memory performance and sex. Trend or non-significant predictors are indicated in brackets, while significant predictors (p < 0.05) are listed without brackets. Positive beta-weights are shown in green, and negative beta-weights are shown in orange. Highlighted variables represent those that are consistently significant across both liberal and conservative models, as well as informed and empty models for each Aβ variable. Abbr. MOCA: Montreal Cognitive Assessment, RVL: resultant vector length, PSI: phase-slope index, m: male; f: female.*

| **A) Full Model** | | | | | |
| --- | --- | --- | --- | --- | --- |
|  | Estimate | Std. Error | t | p |  |
| (Intercept) | 0.032 | 0.177 | 0.179 | 0.859 |  |
| Night E1 | -0.009 | 0.005 | -1.818 | 0.069 |  |
| Night E2 | -0.005 | 0.005 | -1.144 | 0.253 |  |
| Night E3 | -0.006 | 0.005 | -1.184 | 0.236 |  |
| Aβ change | -1.624 | 2.854 | -0.569 | 0.572 |  |
| MOCA score | -0.001 | 0.003 | -0.27 | 0.789 |  |
| age | -0.001 | 0.002 | -0.497 | 0.622 |  |
| Night E1 : Aβ change | 1.564 | 1.443 | 1.084 | 0.278 |  |
| Night E2 : Aβ change | 0.408 | 1.434 | 0.285 | 0.776 |  |
| Night E3 : Aβ change | -0.395 | 1.437 | -0.275 | 0.783 |  |
|  |  |  |  |  |
| **A) Cognitively Healthy Model** | | | | | |
| (Intercept) | -0.312 | 0.282 | -1.107 | 0.28 |  |
| Night E1 | -0.008 | 0.006 | -1.344 | 0.179 |  |
| Night E2 | -0.011 | 0.006 | -1.766 | 0.077 |  |
| Night E3 | -0.005 | 0.006 | -0.907 | 0.364 |  |
| Aβ change | -7.14 | 3.686 | -1.937 | 0.063 |  |
| MOCA score | 0.014 | 0.008 | 1.676 | 0.107 |  |
| age | -0.002 | 0.002 | -0.829 | 0.416 |  |
| Night E1 : Aβ change | 2.249 | 1.723 | 1.305 | 0.192 |  |
| Night E2 : Aβ change | -0.029 | 1.73 | -0.017 | 0.987 |  |
| Night E3 : Aβ change | 0.924 | 1.713 | 0.539 | 0.59 |  |
|  |  |  |  |  |  |
| **C) Cognitively Impaired Model** | | | | | |
| (Intercept) | 0.099 | 0.215 | 0.459 | 0.652 |  |
| Night E1 | -0.009 | 0.008 | -1.176 | 0.24 |  |
| Night E2 | 0.002 | 0.008 | 0.214 | 0.831 |  |
| Night E3 | -0.005 | 0.008 | -0.704 | 0.481 |  |
| Aβ change | 5.533 | 3.609 | 1.533 | 0.138 |  |
| MOCA score | -0.013 | 0.006 | -2.024 | 0.059 |  |
| age | 0.002 | 0.003 | 0.739 | 0.47 |  |
| Night E1 : Aβ change | 0.219 | 2.616 | 0.084 | 0.933 |  |
| Night E2 : Aβ change | 0.973 | 2.549 | 0.382 | 0.703 |  |
| Night E3 : Aβ change | -3.275 | 2.616 | -1.252 | 0.211 |  |
|  |  |  |  |  |  |

*Table S3. Results of linear mixed effect models (LMMs) for SW–spindle coupling directionality. The models tested whether PLAS-induced changes in SW–spindle coupling directionality—as measured via an approximation to the phase slope index (PSI) on the single trial level—interact with changes in Aβ 42/40 ratios from pre to post intervention.* ***A.*** *results for the full model containing all participants.* ***B.*** *results for the cognitively healthy (MOCA score ≥ 26) subgroup.* ***C.*** *results for the cognitively impaired (Moca Score < 26) subgroup. Age and MOCA score were included as control variables, with each participant assigned a random intercept.*
